# Supplementary material
Source: PubMed Central journal article supplement (PMC2784143)
Supplement: NIHMS153732-supplement-Supp1.pdf [file NIHMS153732-supplement-Supp1.pdf]

## **APPENDIX**

### **List of Maternity Hospitals and responsible physicians participating in the study**

Ospedale Sant'Anna, Università di Ferrara, Ferrara: G. Bosi, M. Simoni; Ospedale del Ponte, Università dell'Insubria, Varese: L. Nespoli, L. Nosetti, E. Rezzonico; Ospedale Infantile Regina Margherita, Torino: F. Gabbarini, A. Vigo; IRCCS Policlinico San Matteo, Università di Pavia, Pavia: S. Mannarino; IRCCS Istituto G. Gaslini, Genova: A. Rimini, A. Smeraldi; IRCCS Fondazione Policlinico Mangiagalli e Regina Elena, Milano: P. Salice, F. Mosca, M. Gioventù\*; Ospedale Meyer, Firenze: G. Calabri, R. Piumelli; Ospedale Perrino, Brindisi: E. Rosati, G. Latini; Ospedale Infermi, Rimini: V. Vecchi, L. Ciacci; Ospedale San Gerardo, Monza (MI): P. Russo, A. Imperatore; Policlinico GB Rossi, Verona: E. Padovani; Ospedale Cà Foncello, Treviso: PG. Flora; Ospedale Ferrarotto, Catania: M. Campisi; Ospedale Sant'Anna, Como: G. Ferrari; Presidio Ospedaliero Lamezia Terme (CZ): S. Canepa; AO Busto Arsizio (VA): R. Giorgetti; Ospedale Macedonio Melloni, Milano: G. Moro; Ospedale Casa del Sole, Palermo: S. Pipitone.

\*deceased
